# Supplementary material for: A low cost bimetallic AuCu3tetramer on Ti2CO2MXene as an efficient catalyst for CO oxidation: a theoretical prediction
Source: Royal Society of Chemistry journal article supplement (doi:10.1039/d2cp02787a), 2022-01-01
Supplement: d2cp02787a1.pdf [file d2cp02787a1.pdf]

**Supplementary Material: Low cost bimetallic AuCu<sub>3</sub> tetramer on Ti<sub>2</sub>CO<sub>2</sub> MXene as an efficient catalyst for CO oxidation: A theoretical prediction**

Aswathi Mohan T<sup>1, a)</sup> and Prasenjit Ghosh<sup>2, b)</sup>

<sup>1)</sup>*Department of Chemistry, Indian Institute of Science Education and Research (IISER), Pune 411008, Maharashtra , India*

<sup>2)</sup>*Department of Physics, Centre for Energy Science, Indian Institute of Science Education and Research (IISER), Pune 411008, Maharashtra , India*

---

<sup>a)</sup>Electronic mail: [aswathi.mohan@students.iiserpune.ac.in](mailto:aswathi.mohan@students.iiserpune.ac.in)

<sup>b)</sup>Electronic mail: [pghosh@iiserpune.ac.in](mailto:pghosh@iiserpune.ac.in)

TABLE S1. Adsorption energy of bimetallic clusters on  $\text{Ti}_2\text{CO}_2$  MXene.

| Cluster composition      | Adsorption energy (eV) |
|--------------------------|------------------------|
| $\text{Cu}_4$            | -3.56                  |
| $\text{Au}_4$            | -2.08                  |
| $\text{AuCu}_3$          | -3.41                  |
| $\text{Au}_2\text{Cu}_2$ | -2.23                  |
| $\text{Au}_3\text{Cu}$   | -2.31                  |

TABLE S2. Adsorption energy of CO and  $\text{O}_2$  on  $\text{AuCu}_3/\text{Ti}_2\text{CO}_2$ .

| Species           | Adsorption energy (eV) |
|-------------------|------------------------|
| CO                | -1.26                  |
| $\text{O}_2$      | -0.83                  |
| CO + $\text{O}_2$ | -2.16                  |

**MvK mechanism:** A crucial factor decisive of this path is oxygen vacancy formation energy. For  $\text{Ti}_2\text{CO}_2$ , it was found to be  $3.27 \text{ eV}^1$ , which is comparable to substrates like rutile  $\text{TiO}_2(110)$  (around  $3.00 \text{ eV}$ ) that is known for facile oxygen vacancy formation<sup>2</sup>. Hence to investigate the MvK mechanism for CO oxidation, we take the most stable CO adsorption geometry (**IS4** in Fig. S3). From the reaction thermodynamic studies, we find that CO attacks an O atom from the top layer of  $\text{Ti}_2\text{CO}_2$ , forming a  $\text{CO}_2$  intermediate (**INT12**),  $2.23 \text{ eV}$  higher in energy. The next step of  $\text{CO}_2$  desorption is also endothermic, making the whole mechanism unlikely to happen.

TABLE S3. Reaction barrier for CO oxidation on  $\text{AuCu}_3/\text{Ti}_2\text{CO}_2$ .

| Cycle  | Mechanism | Reaction barrier (eV) |
|--------|-----------|-----------------------|
| First  | LH        | 0.56                  |
| Second | ER        | 0.37                  |
| Second | LH        | 0.57                  |

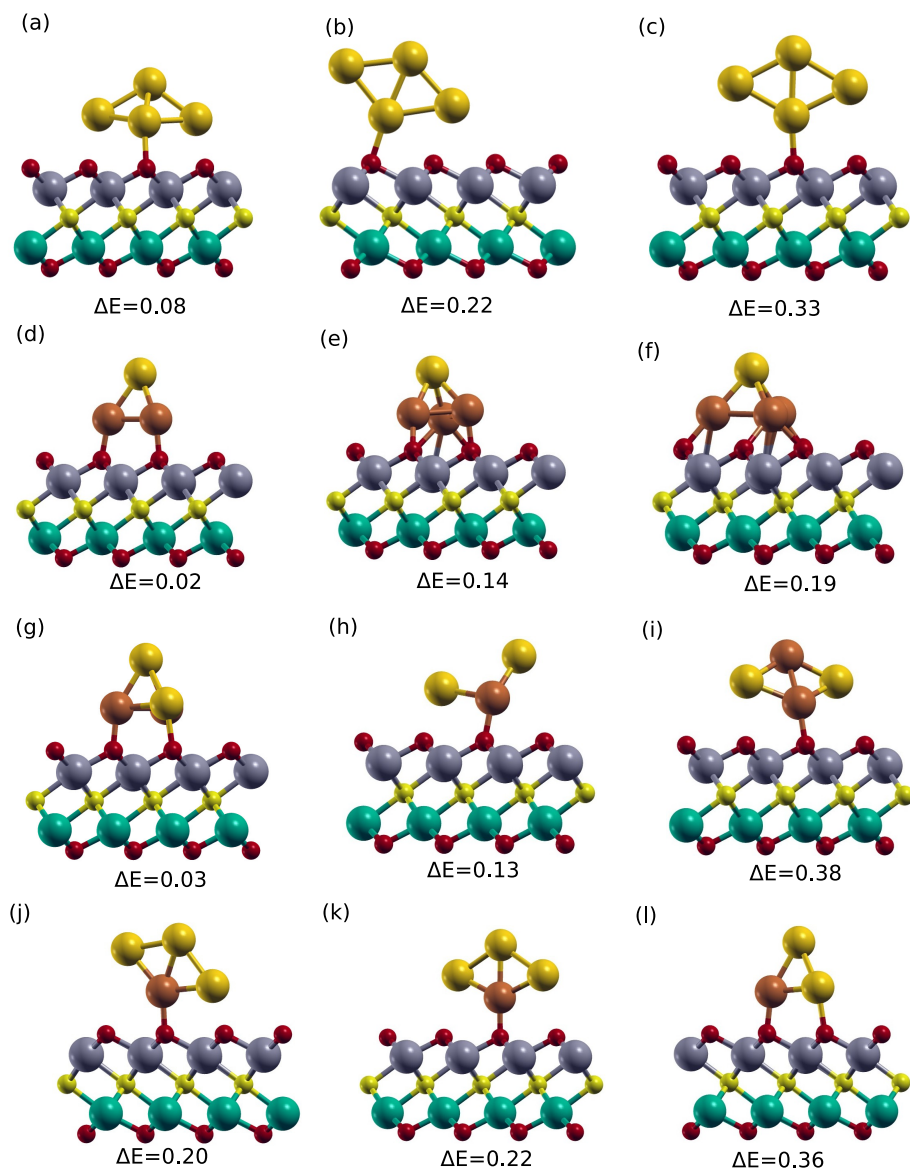

FIG. S1. Stable higher energy structures of a)-c)  $\text{Au}_4$ , d)-f)  $\text{AuCu}_3$ , g)-i)  $\text{Au}_2\text{Cu}_2$  and j)-l)  $\text{Au}_3\text{Cu}$  clusters deposited on  $\text{Ti}_2\text{CO}_2$  MXene. Relative energy with respect to the corresponding most stable geometry given in eV.

## REFERENCES

- <sup>1</sup>L. Xiao-Hong, S. Xiang-Ying and Z. Rui-Zhou, *RSC advances*, 2019, **9**, 27646–27651.
- <sup>2</sup>M. V. Ganduglia-Pirovano, A. Hofmann and J. Sauer, *Surface science reports*, 2007, **62**, 219–270.

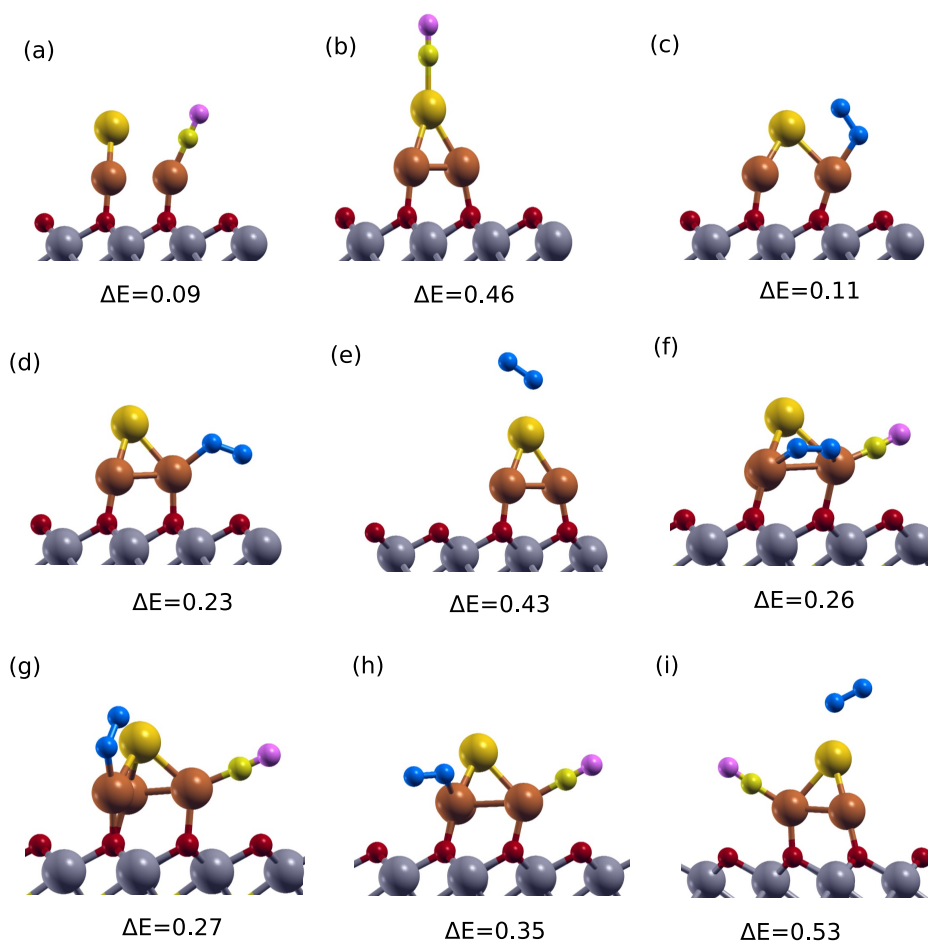

FIG. S2. Stable higher energy structures of a)-b) CO, c)-e) O<sub>2</sub> and f)-i) CO and O<sub>2</sub> co-adsorption on AuCu<sub>3</sub>/Ti<sub>2</sub>CO<sub>2</sub>. Relative energy with respect to the corresponding most stable geometry given in eV.

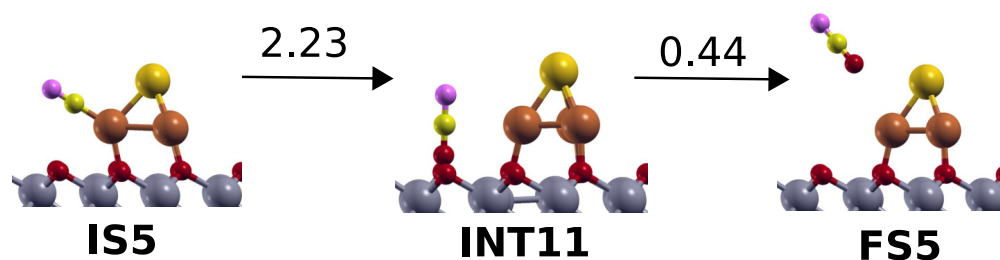

FIG. S3. First cycle of CO oxidation via MvK mechanism on AuCu<sub>3</sub>/Ti<sub>2</sub>CO<sub>2</sub>. The reaction energies in eV are marked above the arrow for each step.

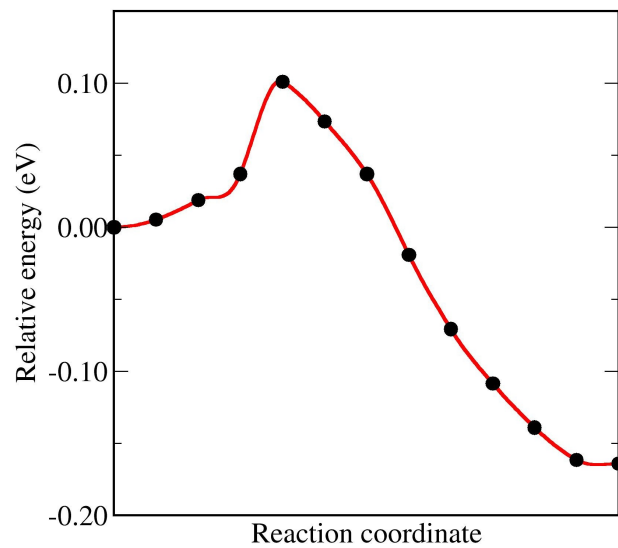

FIG. S4. Reaction energy profile of **IS1** to **INT1**.

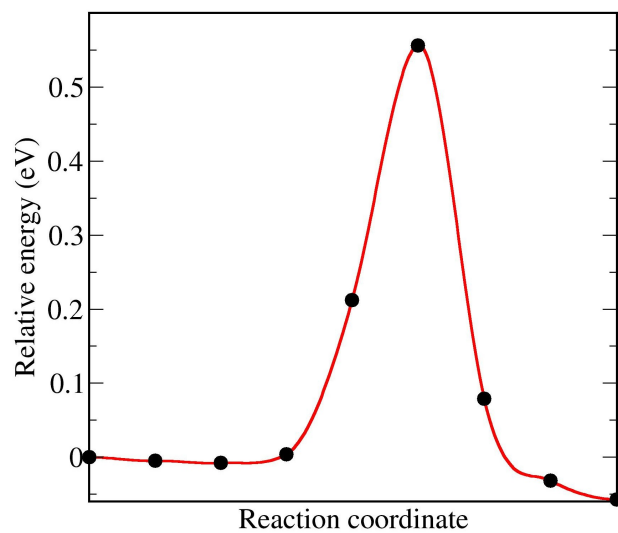

FIG. S5. Reaction energy profile of **INT1** to **INT2**.

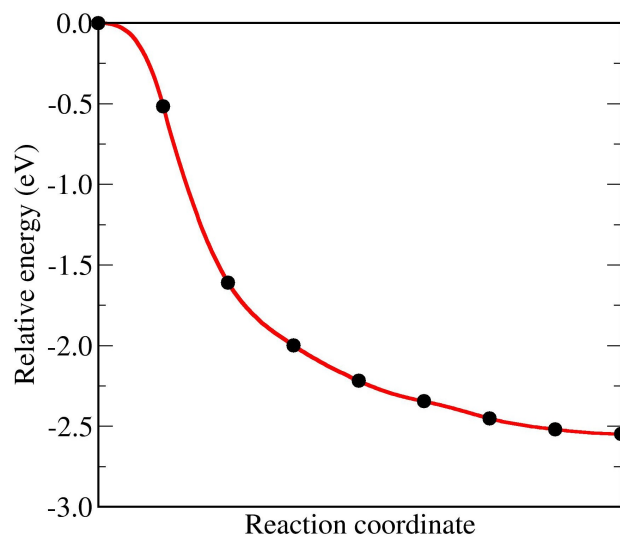

FIG. S6. Reaction energy profile of **INT2** to **INT3**.

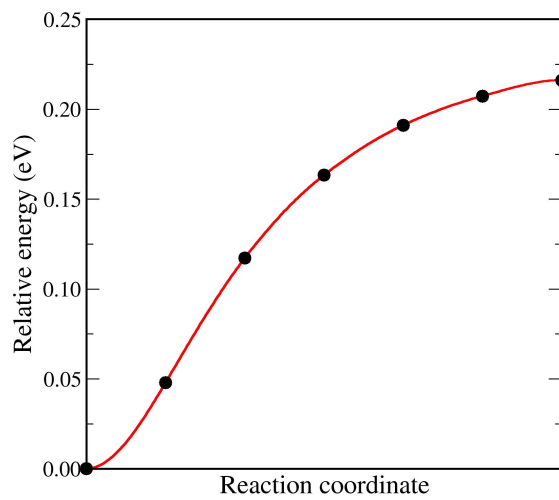

FIG. S7. Reaction energy profile of **INT3** to **FS1**.

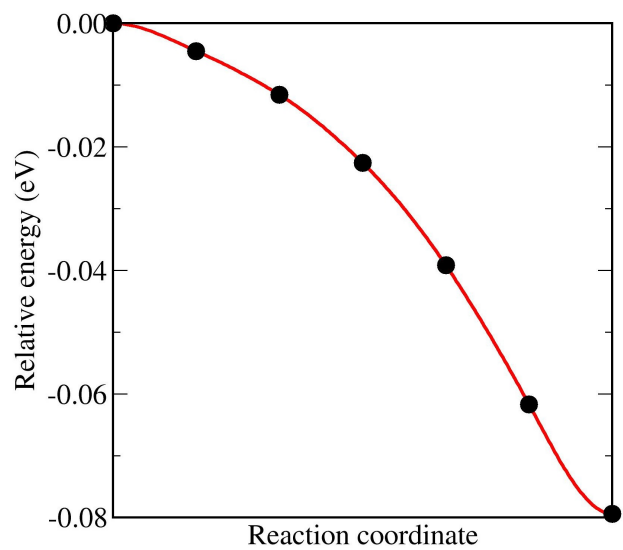

FIG. S8. Reaction energy profile of **IS2** to **INT4**.

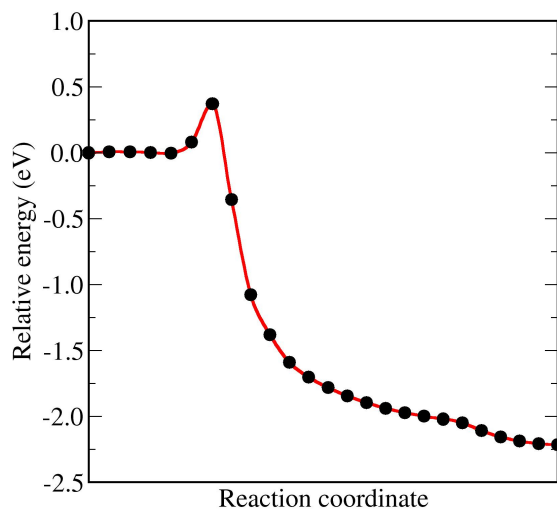

FIG. S9. Reaction energy profile of **INT4** to **INT5**.

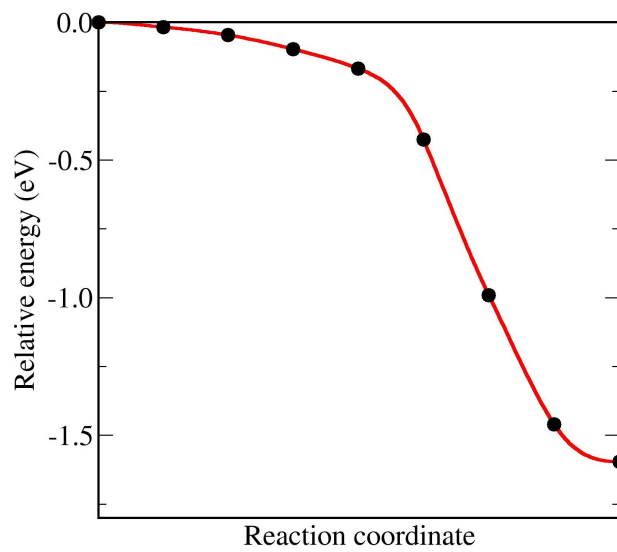

FIG. S10. Reaction energy profile of **INT4** to **INT5**.

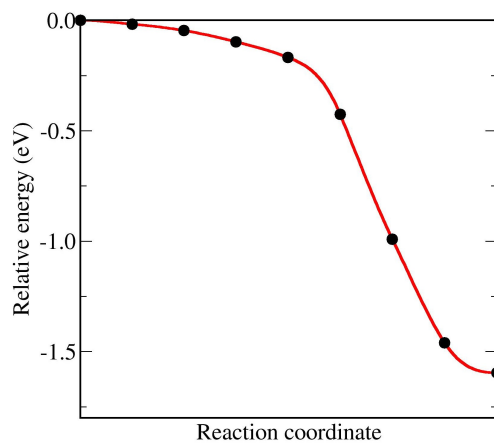

FIG. S11. Reaction energy profile of **IS3** to **INT7**.



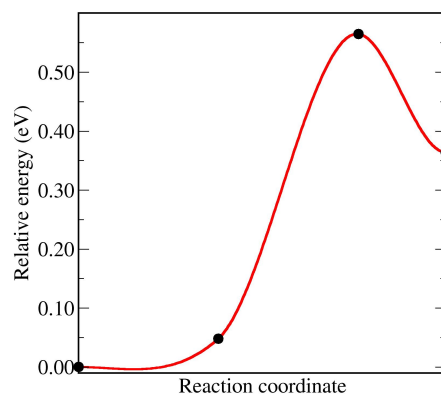

FIG. S12. Reaction energy profile of **INT7** to **INT8**.

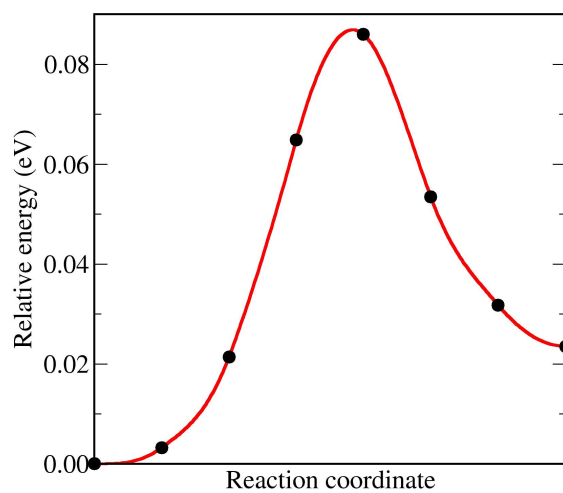

FIG. S13. Reaction energy profile of **INT8** to **INT9**.

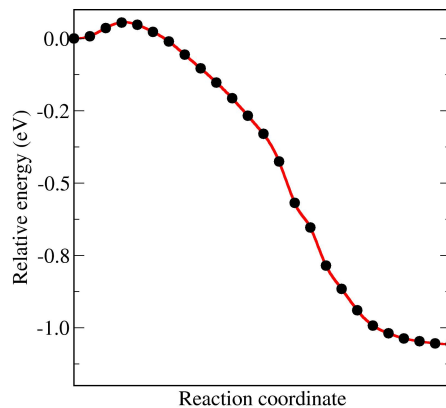

FIG. S14. Reaction energy profile of **INT9** to **INT10**.

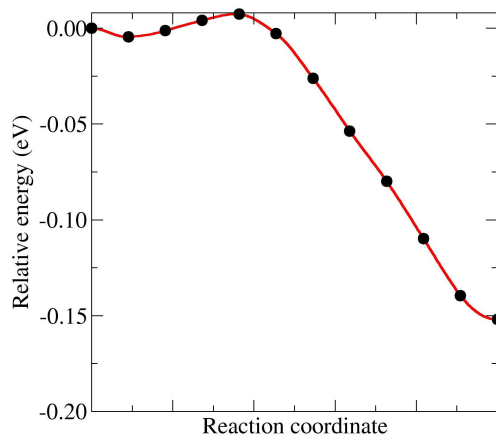

FIG. S15. Reaction energy profile of **INT10** to **INT11**.

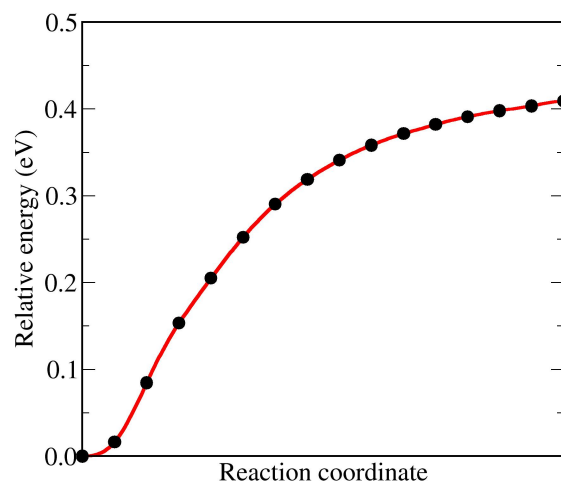

FIG. S16. Reaction energy profile of **INT11** to **FS3**.
